# Supplementary material for: Mechanisms of Basin-Scale Nitrogen Load Reductions under Intensified Irrigated Agriculture
Source: PubMed Central journal article supplement (PMC4366109; doi:10.1371/journal.pone.0120015), 2015-03-19
Supplement: pone.0120015.s005.pdf [file pone.0120015.s005.pdf]

## SUPPLEMENTARY INFORMATION

### Mechanisms of basin-scale nitrogen load reductions under intensified irrigated agriculture

Rebecka Törnqvist, Jerker Jarsjö, Josefin Thorlund, P. Suresh C. Rao, Nandita B. Basu and Georgia Destouni

---

#### Derivation of the relation between the basin-scale ratio of average nutrient concentration $C_{out}$ at the outlet of the basin and concentration $C_{in}$ in the runoff, and recirculation ratio, $r$ (Equation 1 of the main paper).

Flow scheme and notation are according to Figure 2 of the main paper.

Determine the relation between  $Q_{in}$ ,  $Q_{out}$ , and  $r$ .

From figure 2:  $Q_{out}=Q_{in}-ET_{irr}=Q_{in}\cdot f\cdot Q_r$ , where  $Q_r=r\cdot Q_{out}$  per definition. Hence,

$$Q_{in}/Q_{out}=1+f\cdot r \quad (1)$$

Determine  $C_{mix}$  from flow-weighted averaging of  $C_{in}$  and  $C_{irr}$

$$C_{mix} = \frac{C_{in}\cdot Q_{in}+C_{irr}\cdot Q_{irr}}{Q_{in}+Q_{irr}} \quad (2)$$

Express  $C_{mix}$  as function of  $C_{in}$ ,  $C_{out}$ ,  $f$ , and  $r$ . Insert  $C_{irr}=1/(1-f)\cdot C_{out}$  and  $Q_{irr}=(1-f)\cdot Q_r$  (Figure 2) into (2). Divide the numerator and the denominator of (2) with  $Q_{out}$  and insert Equation (1). This yields:

$$C_{mix} = \frac{C_{in}(1+f\cdot r)+C_{out}\cdot r}{1+r} \quad (3)$$

Assume that N undergoes first-order attenuation in the soil water-groundwater system (blue box of Figure 2). For first order decay we then have per definition:

$$C_{out} = C_{mix} \cdot \exp[-\lambda(r) \cdot T(r, f)] \quad (4)$$

in which  $T(r, f)$  equals

$$T(r, f) = V_{s-w}/Q_{s-w}(r, f) \quad (5)$$

where  $V_{s-w}$  and  $Q_{s-w}(r, f)$  are the water-filled volume of, and water flow through the soil-water system. Inserting  $Q_{s-w}(r, f)=Q_{in}+(1-f)Q_r$  (see Figure 2),  $Q_r=r\cdot Q_{out}$  (per definition) and  $Q_{out}=Q_{in}/(1+f\cdot r)$  (from (1)) into (5) yields

$$T(r, f) = \frac{V_{s-w}}{Q_{in}} \cdot \left(1 + \frac{(1-f) \cdot r}{1+f \cdot r}\right)^{-1} = T_{r=0} \cdot \left(1 + \frac{(1-f) \cdot r}{1+f \cdot r}\right)^{-1} \quad (6)$$

Inserting (6) into (4), expressing the degradation rate  $\lambda$  as a function of  $r$  according to  $\lambda(r)=(1+\alpha \cdot r)\lambda$  (section 2.3 of the main text), and letting  $T=T_{r=0}$  denote the mean travel time under conditions of no recirculation, we obtain:

$$C_{out} = C_{mix} \cdot \exp \left[ -\lambda T (1 + \alpha r) \cdot \left(1 + \frac{(1-f) \cdot r}{1+f \cdot r}\right)^{-1} \right] \quad (7)$$

Inserting (3) into (7), solving the resulting equation for  $C_{out}$ , and dividing by  $C_{in}$ , we obtain Equation (1) of the main paper.

### List of variables

$\alpha$  – Attenuation constant

$\lambda$  – Attenuation rate

$\lambda T$  – Attenuation product

$C_{out}/C_{in}$  - Output-input concentration ratio

$C_{in}$  – Concentration of upstream river runoff

$C_{irr}$  - Concentration of recirculated water

$C_{mix}$  - Flow-weighted average of  $C_{in}$  and  $C_{irr}$

$C_{out}$  - Concentration in outlet river runoff

$ET_{irr}$  - Evapotranspiration from irrigation water

$ET_{nat}$  – Natural evapotranspiration without irrigation

$f$  – Fraction of irrigation water lost through evapotranspiration

$Q_{irr}$  – Fraction of the recirculated water not lost through  $ET_{irr}$

$Q_{in}$  – Upstream river discharge

$Q_{out}$  – Outlet river discharge

$Q_{s-w}$  – Total discharge in soil-water system

$Q_r$  – Recirculated water

$r$  – Recirculation ratio

$T$  - Advective travel time

$V_{s-w}$  – Volume of soil-water system
